# Supplementary material
Source: HighWire-hosted journal article supplement (https://erj.ersjournals.com/content/54/3/1901578)
Supplement: inline-supplementary-material-1 [file inline-supplementary-material-1.pdf]

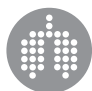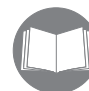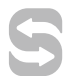

SHAREABLE PDF

# Still dying in plain sight: missed and misclassified deaths due to tuberculosis in hospitals

Byron William Patrick Reeve<sup>1</sup>, Rosella Centis <sup>2</sup> and Grant Theron <sup>1</sup>

**Affiliations:** <sup>1</sup>NRF/DST Centre of Excellence for Biomedical Tuberculosis Research; South African Medical Research Council Centre for Tuberculosis Research; Division of Molecular Biology and Human Genetics, Faculty of Medicine and Health Sciences, Stellenbosch University, Cape Town, South Africa. <sup>2</sup>Servizio di Epidemiologia Clinica delle Malattie Respiratorie, Istituti Clinici Scientifici Maugeri IRCCS, Tradate, Italy.

**Correspondence:** Grant Theron, 4026 Education Building, Division of Molecular Biology and Human Genetics, Faculty of Medicine and Health Sciences, Francie Van Zijl Drive, Cape Town, South Africa, 7550. E-mail: gtheron@sun.ac.za

@ERSpublications

**The study reported by Garcia-Basterio and co-workers has used Xpert MTB/RIF Ultra in cadavers for the first time, to improve detection of TB cases that would have ordinarily been missed by histology or clinical examination.** <http://bit.ly/2P9Zpyz>

**Cite this article as:** Reeve BWP, Centis R, Theron G. Still dying in plain sight: missed and misclassified deaths due to tuberculosis in hospitals. *Eur Respir J* 2019; 54: 1901578 [<https://doi.org/10.1183/13993003.01578-2019>].

This single-page version can be shared freely online.

Diagnostic tests for tuberculosis (TB) have undergone an era of unprecedented innovation [1]. Over the past century, the bacteriological diagnosis of TB was primarily based on sputum smear microscopy and culture (solid and subsequently liquid culture). Rapid new molecular tests have been introduced, including the automated nucleic acid amplification test Xpert MTB/RIF (Xpert) and its recent successor Xpert MTB/RIF Ultra (Ultra) [2–4]. Diagnostic algorithms have been developed that combine these new tests with established tools [5–7]; however, such algorithms are often country- or setting-specific, depending on test availability, differ in quality of implementation [2–4, 8], and are infrequently deployed in decedents.
